# Supplementary material for: Neutralizing Activity of Anti-interferon-γ Autoantibodies in Adult-Onset Immunodeficiency Is Associated With Their Binding Domains
Source: PubMed Central journal article supplement (PMC6702949; doi:10.3389/fimmu.2019.01905), 2019-08-14
Supplement: Image_1.pdf [file Image_1.pdf]

*Supplementary Material*

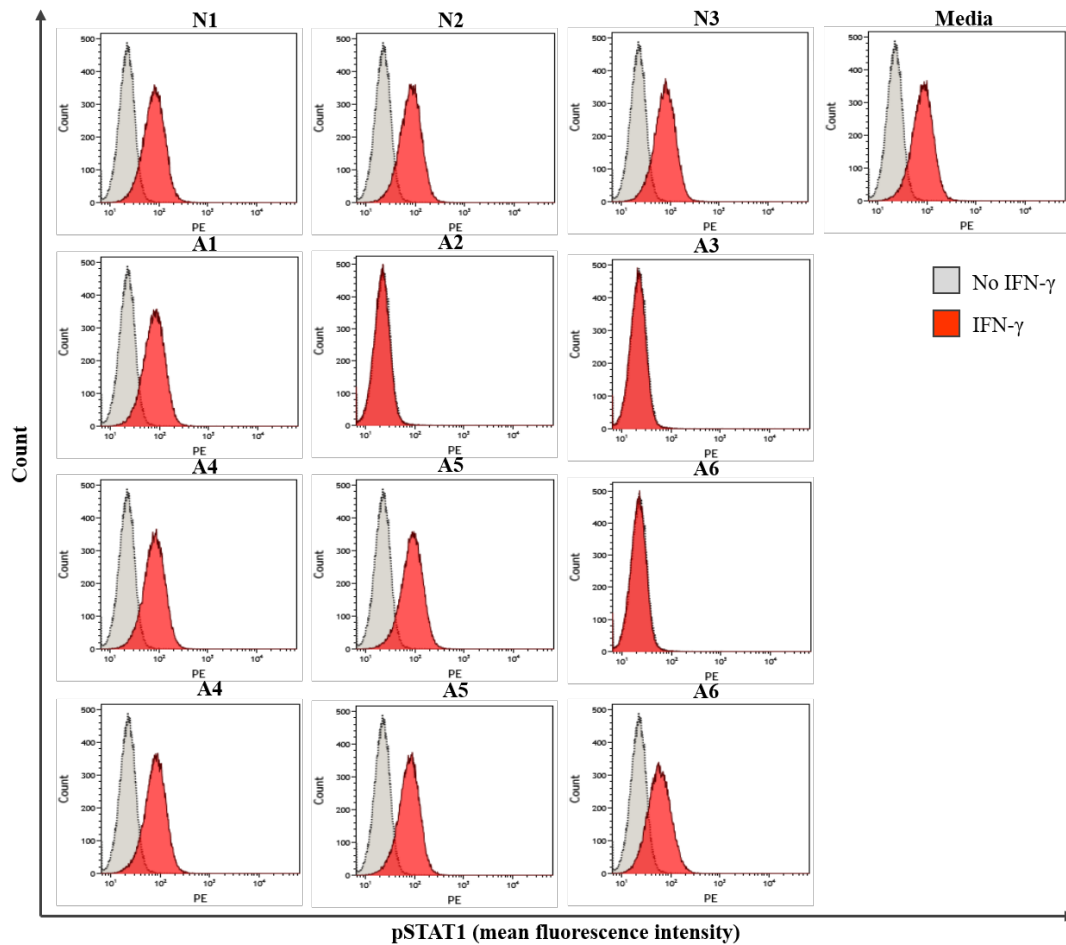

**Supplementary Figure 1.** STAT1 phosphorylation in THP-1 cells after IFN- $\gamma$  treatment. THP-1 cells were treated with rIFN- $\gamma$  in the presence or absence of patient serum or healthy serum. The intracellular pSTAT1 level was evaluated by flow cytometry. Media control was used as system control. N, normal serum (n=3); A, AOID patient serum (n=9).
